# Supplementary material
Source: PubMed Central journal article supplement (PMC3310418)
Supplement: supp_mol.111.076356_Supplemental_dataMOL_76356.pdf [file supp_mol.111.076356_Supplemental_dataMOL_76356.pdf]

**Article's title:**

An Inducible Cytochrome P450 3A4-dependent Vitamin D Catabolic Pathway

**Authors:**

Zhican Wang, Yvonne S. Lin, Xi Emily Zheng, Tauri Senn, Takanori Hashizume, Michele Scian, Leslie J. Dickmann, Sidney D. Nelson, Thomas A. Baillie, Mary F. Hebert, David Blough, Connie L. Davis, Kenneth E. Thummel

**Journal Title:**

Molecular Pharmacology

**Supplemental Figure 1.**

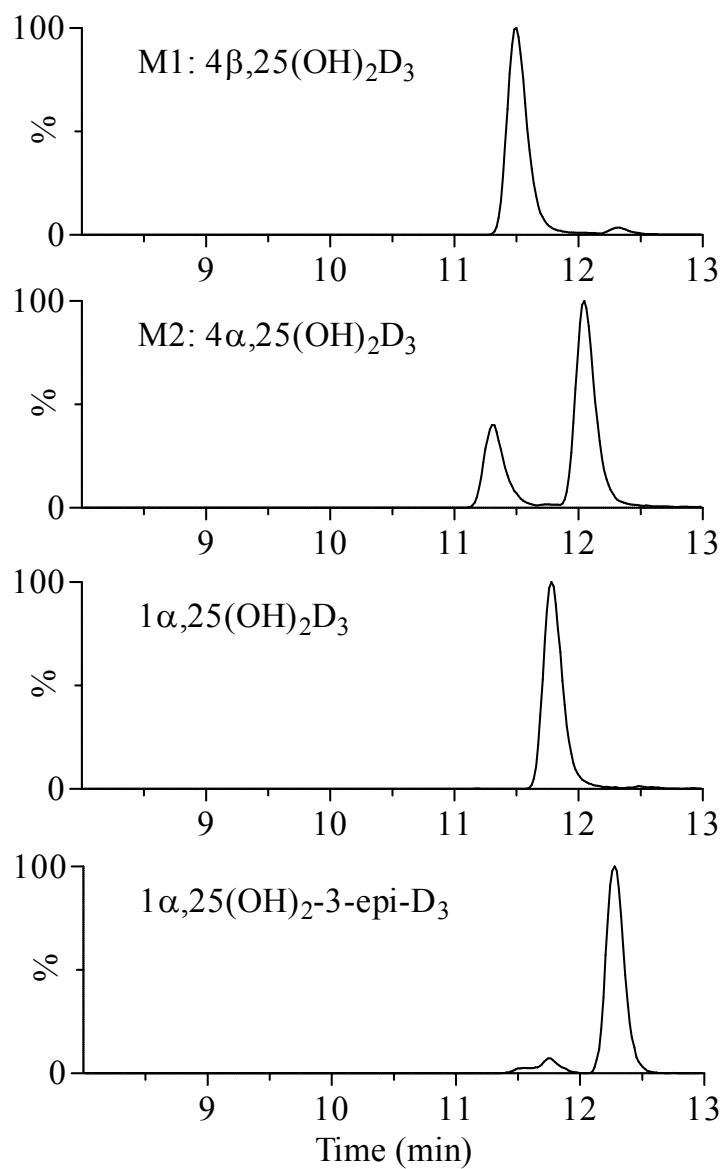

**Supplemental Figure 1:** Representative ion current chromatograms of the PTAD-derivatized vitamin D<sub>3</sub> metabolites by LC-MS/MS. The MRM ( $m/z$  574  $\rightarrow$  314) chromatograms were obtained from either standards or HPLC-purified metabolites.

**Supplemental Figure 2.**

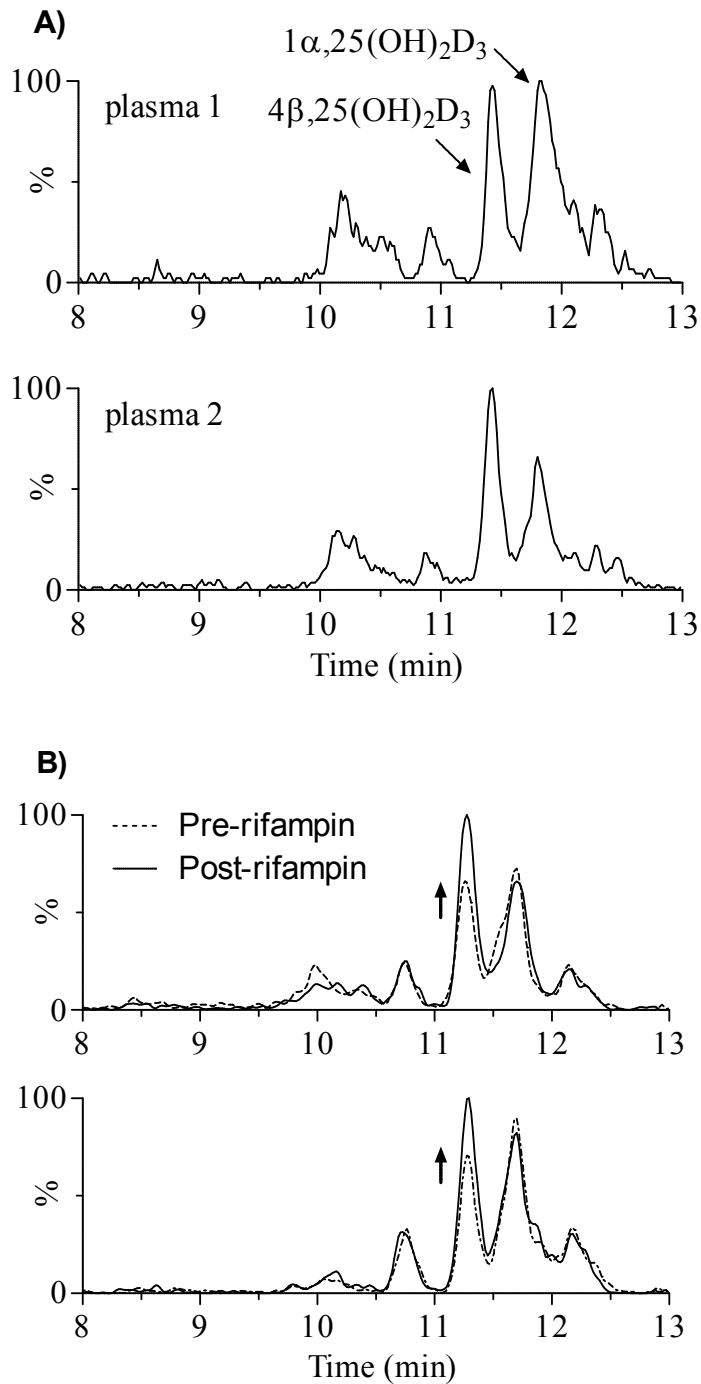

**Supplemental Figure 2.** Representative ion chromatograms of  $4\beta,25(\text{OH})_2\text{D}_3$  and  $1\alpha,25(\text{OH})_2\text{D}_3$  in plasma. A) Plasma from two healthy individuals; B) Plasma from two subjects before or after rifampin administration in the pilot study. The MRM transition  $m/z\ 574 \rightarrow 314$  was used to detect  $4\beta,25(\text{OH})_2\text{D}_3$  and  $1\alpha,25(\text{OH})_2\text{D}_3$  simultaneously.

**Supplemental Figure 3.**

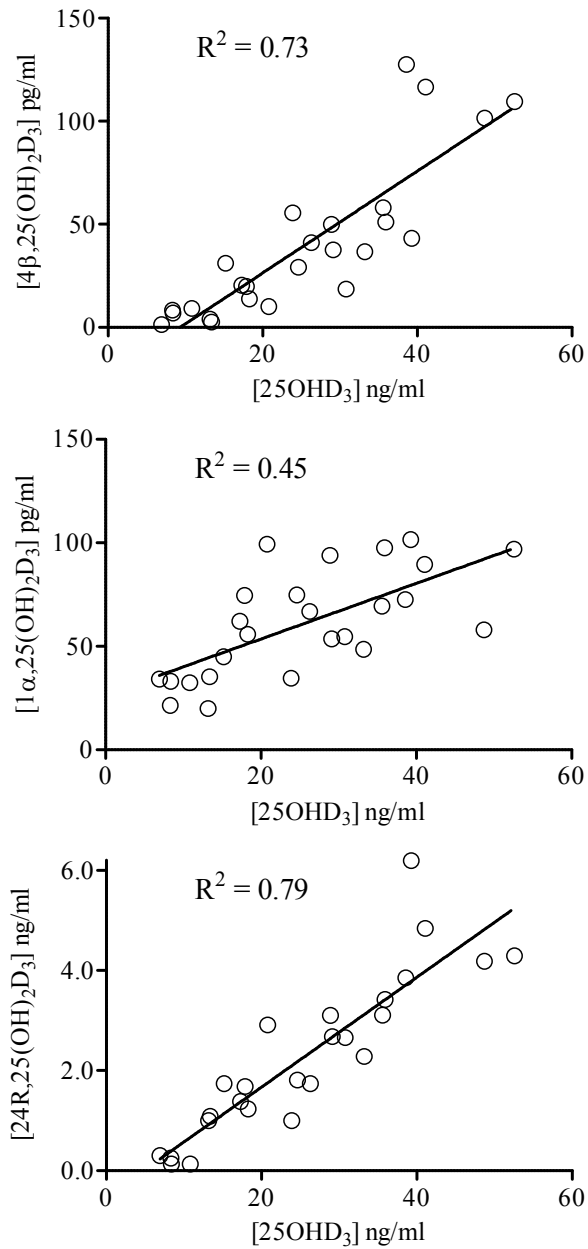

**Supplemental Figure 3.** Correlation of plasma concentrations of 4β,25(OH)<sub>2</sub>D<sub>3</sub>, 1α,25(OH)<sub>2</sub>D<sub>3</sub>, and 24R,25(OH)<sub>2</sub>D<sub>3</sub> with 25OHD<sub>3</sub> in healthy volunteers (n = 25). The concentrations of these vitamin D<sub>3</sub> metabolites were determined previously (Wang et al., 2011).
